# Supplementary material for: Short-Term Joint Effects of PM10, NO2 and SO2 on Cardio-Respiratory Disease Hospital Admissions in Cape Town, South Africa
Source: MDPI journal article supplement (doi:10.3390/ijerph19010495), 2022-01-03
Supplement: s1 [file s1]

# Short-term joint effects of multiple air pollutants on cardio-respiratory disease hospital admissions in Cape Town, 2011 – 2016

Temitope Christina Adebayo-Ojo<sup>1,2</sup>, Janine Wichmann<sup>3</sup>, Oluwaseyi Olalekan Arowosegbe<sup>1,2</sup>, Nicole Probst-Hensch<sup>1,2</sup>, Christian Schindler<sup>1,2</sup>, Nino Künzli<sup>1,2</sup>

<sup>1</sup>Department of Epidemiology and Public Health, Swiss Tropical and Public Health Institute, Basel, Kreuzstrasse 2, 4123 Allschwil, Switzerland; oluwaseyiolalekan.arowosegbe@swisstph.ch (O.O.A.); nicole.probst@swisstph.ch (N.p.-H.); christian.schindler@swisstph.ch (C.S.); nino.kuenzli@swisstph.ch (N.K.)

<sup>2</sup>Faculty of Medicine, University of Basel, Basel, 4056, Switzerland

<sup>3</sup>Faculty of Health Sciences, School of Health Systems and Public Health, University of Pretoria, Pretoria, 0002, South Africa, janine.wichmann@up.ac.za

\*Corresponding: temitope.adebayo@swisstph.ch

## Supplementary material - Imputation analysis of ambient air pollutant data and time-series results

Hourly air pollution data for PM<sub>10</sub>, NO<sub>2</sub> and SO<sub>2</sub> were collected from 12 stations – seven stations for PM<sub>10</sub>, 12 for NO<sub>2</sub> and SO<sub>2</sub>, respectively. These concentration were then aggregated to daily level provided at least 75% of the data for that day was available.

The figures below shows the annual proportion of daily means data available for each pollutant from the air quality monitoring stations.

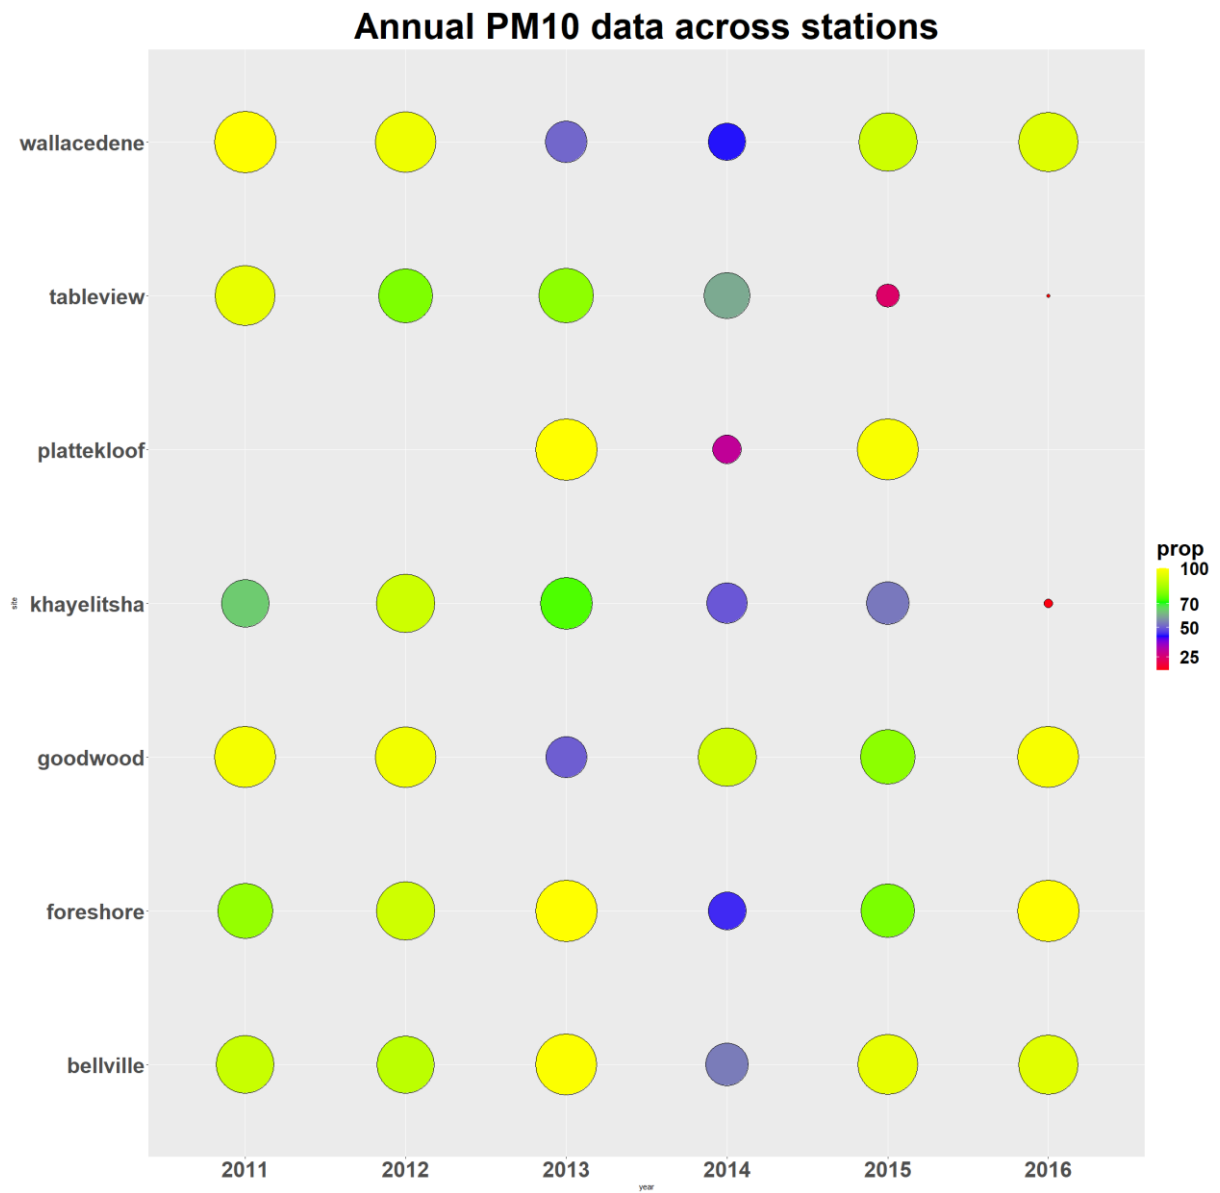

Figure S1: The proportion of PM10 daily means data collected from seven stations from 1st Jan 2011 – 31 October 2016 in Cape Town.

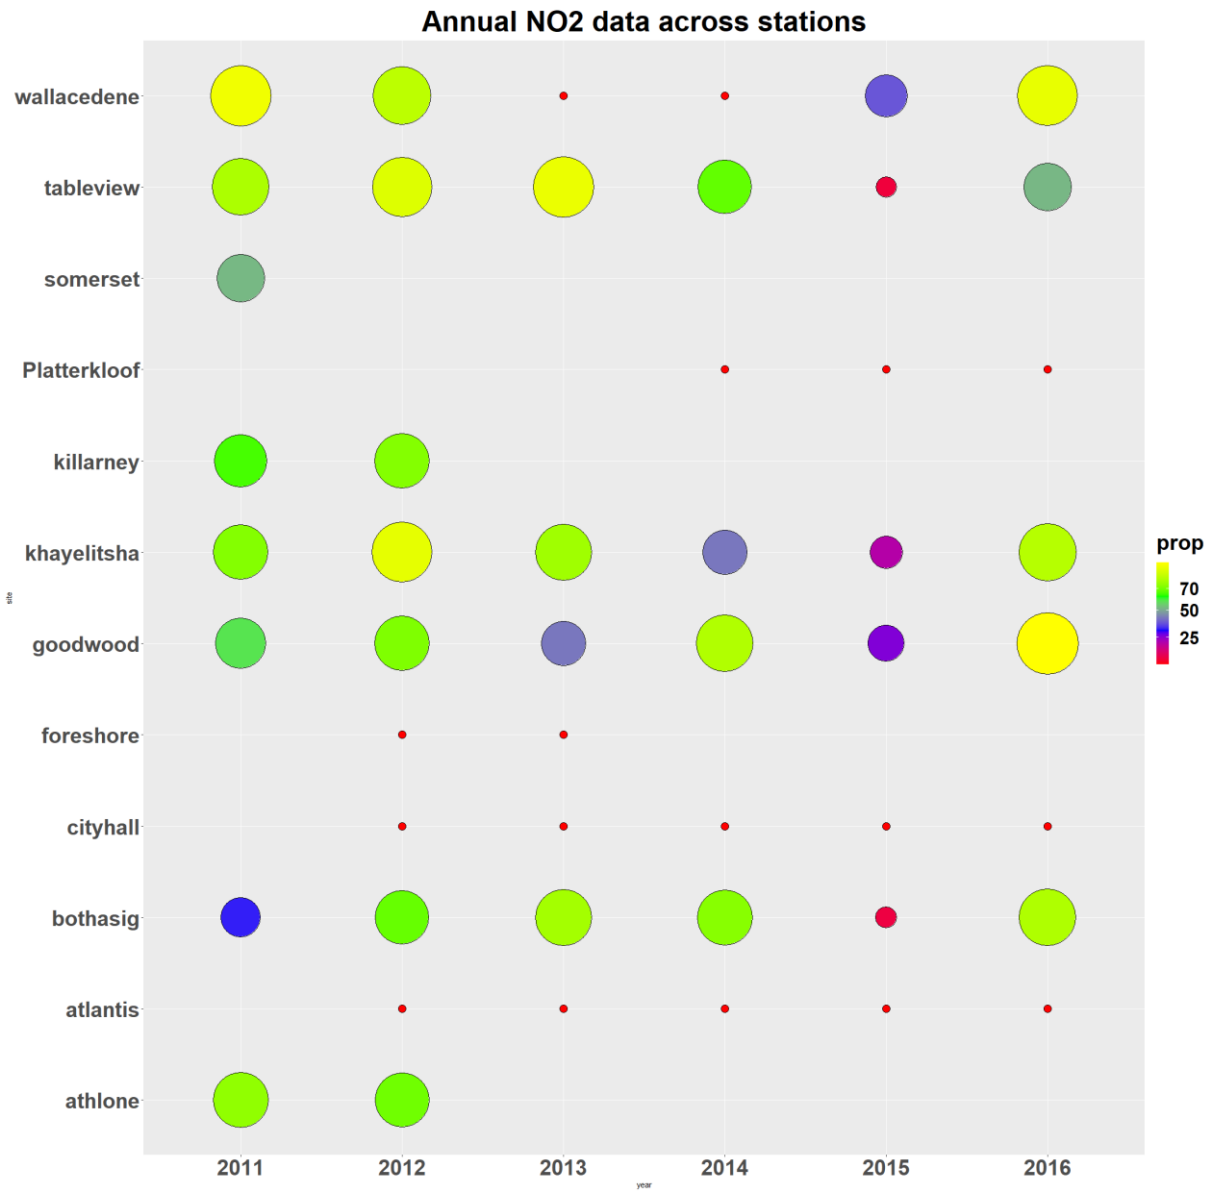

Figure S2: The proportion of NO2 daily means data collected from 12 stations from 1st Jan 2011 – 31 October 2016 in Cape Town.

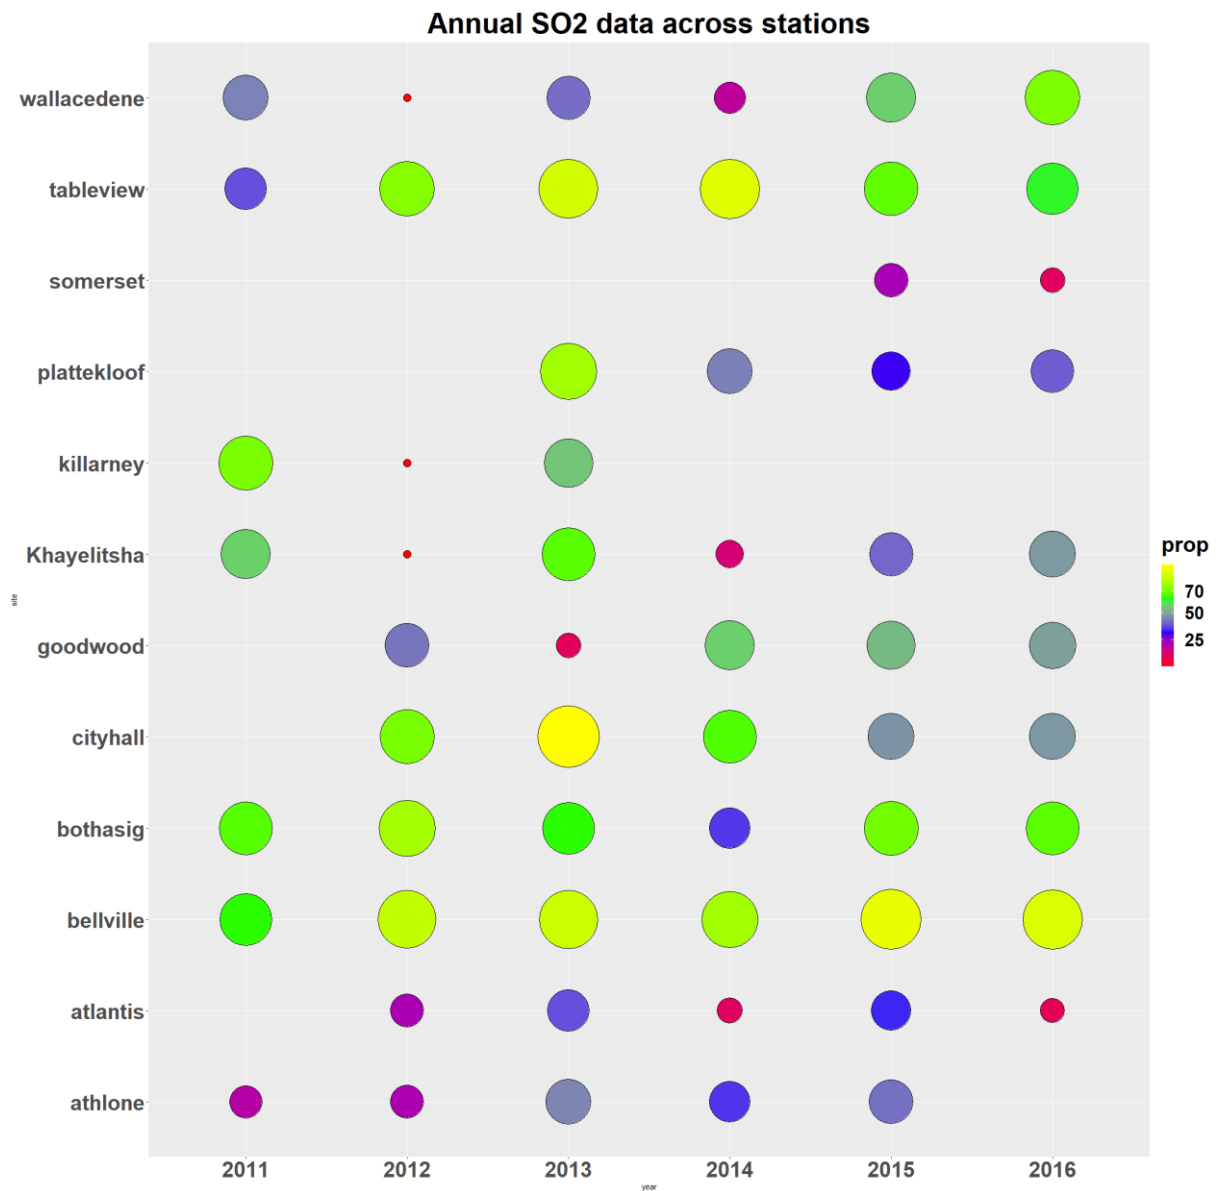

Figure S3: The proportion of SO2 daily means data collected from 12 stations from 1st Jan 2011 – 31 October 2016 in Cape Town.

The geographical locations of some of the stations and their classifications are shown in the map below.

City of Cape Town Air Monitoring Stations

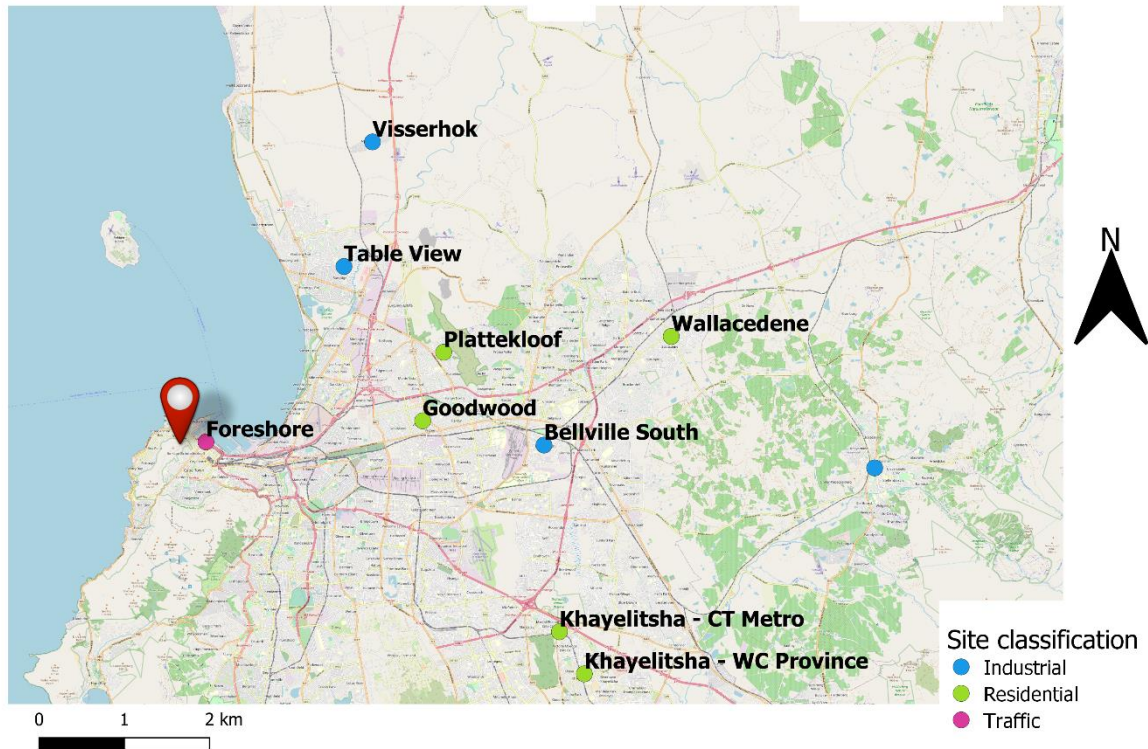

Figure S4: Air quality monitoring station in the City of Cape Town and their classifications. Stations shown on this map are those in close proximity to the City of Cape Town but all 12 stations were used in the analysis.

### Correlation among stations

Spearman correlation was used to test the correlation among the stations for each pollutant's daily means during the the study period. We found high degree of correlation among PM10 stations, moderate correlation for NO2 and low degree of correlation among SO2 stations. This is illustrated in the correlation matrix below.

## Overall PM10 correlation across stations 2011 - 2016

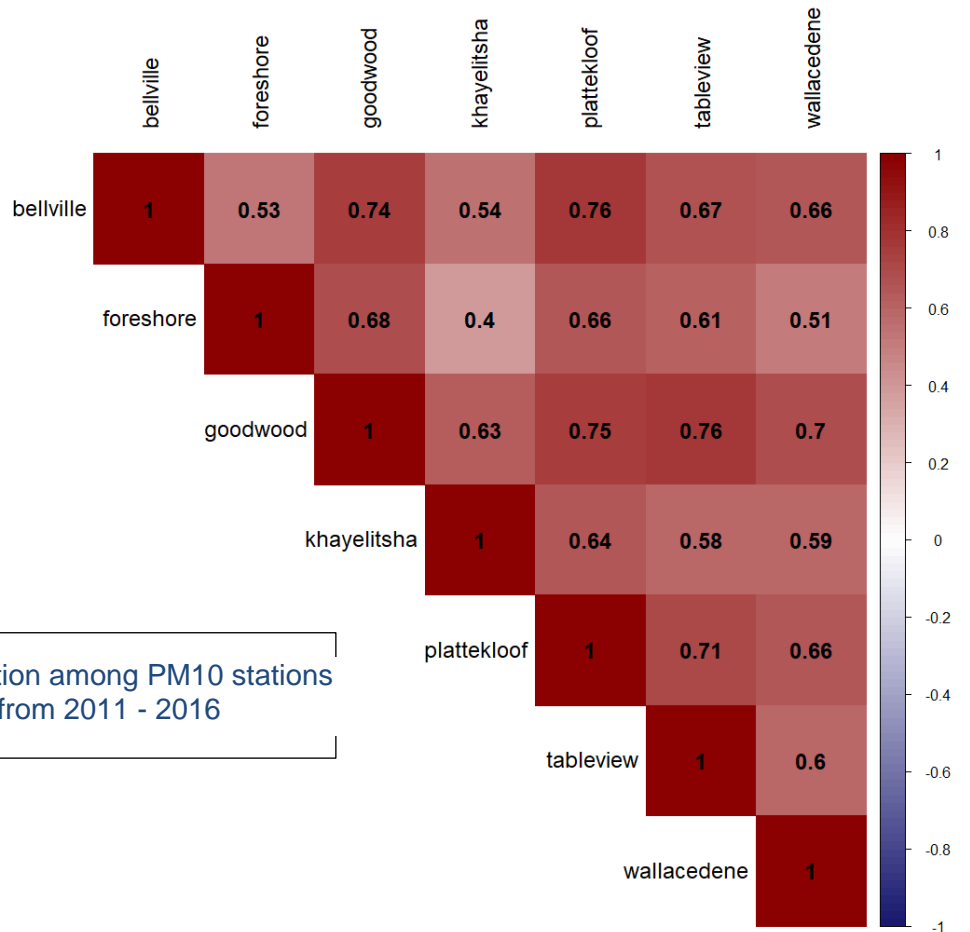

Figure S5: Correlation among PM10 stations using daily means from 2011 - 2016

## Overall NO2 correlation across stations 2011 - 2016

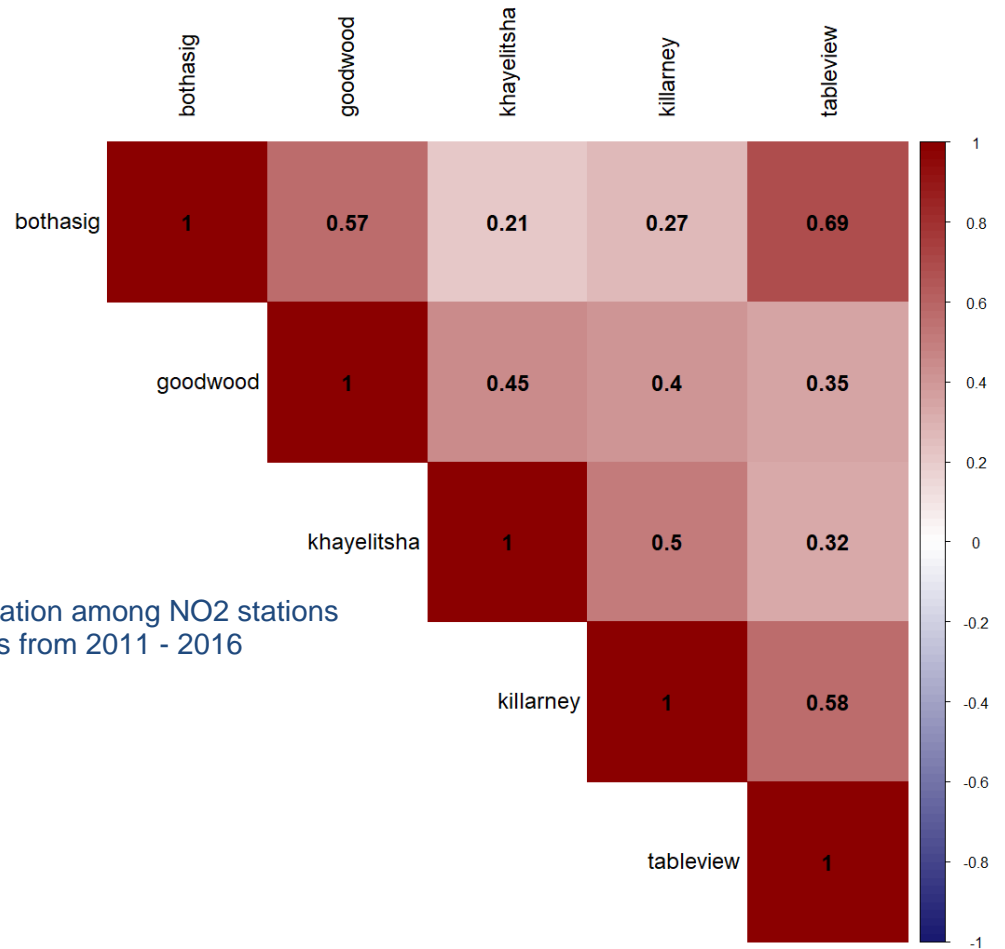

Figure S6: Correlation among NO2 stations using daily means from 2011 - 2016

## Overall SO2 correlation across stations 2011 - 2016

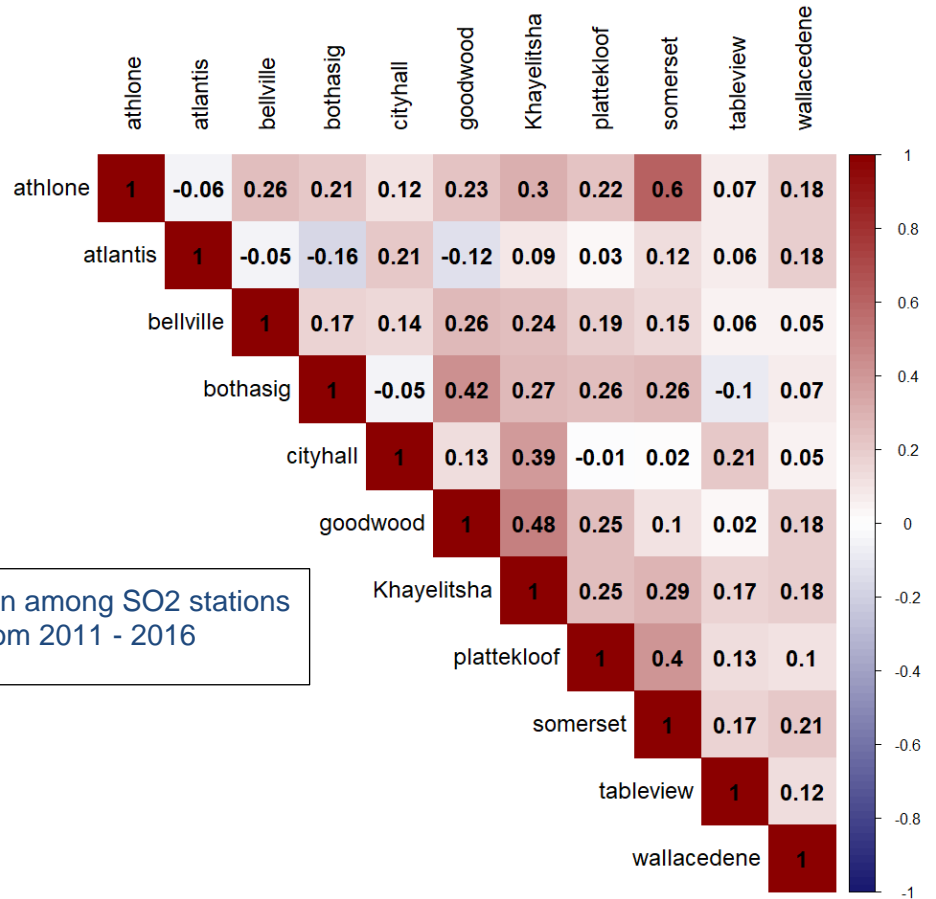

*Figure S7: Correlation among SO2 stations using daily means from 2011 - 2016*



## Imputation of daily air pollutant data

The data obtained included missing days for all stations and pollutants; this is illustrated in *Figure S1*, *Figure S2* and *Figure S3*. Thus, the intuitive solution for each pollutant was to take the average measurement on each day for all the stations with available data to obtain a city-level mean for the time-series analysis. However, this will introduce data gaps in the daily mean levels of the time series data. Therefore, we went a step further by imputing for stations with missing daily means we imputed an estimated mean based on the data of other stations. In case no station had a valid daily mean value, the concentration was defined as “missing”. For instance, if day 5 has a daily city-level mean (that is mean across all stations) but 2 out of 7 stations had no measurement, we imputed daily means for those 2 stations. Furthermore, if day 10 has no measurement from all stations which means no city-level mean, this was left as missing and no imputation was done.

First we describe the notation as - Let  $\mathcal{M} = \{1, \dots, M\}$  denote the set of monitoring stations and let  $C_i(t)$  denote the mean concentration of the pollutant of interest at station  $i$  on day  $t$ . Moreover, let  $m_i(t)$  take the value 1 if a mean value is not available from station  $i$  on day  $t$  and the value 0 otherwise.

Therefore,

|  |                                                    |     |
|--|----------------------------------------------------|-----|
|  | $S(t) = \sum_{i \in \mathcal{M}: m_i(t)=0} C_i(t)$ | (1) |
|--|----------------------------------------------------|-----|

The algorithm

In order to derive the daily city-level imputation factors,  $S(t)$  is estimated using a non-linear regression model.

|  |                                                                                                                                                                                                                                                                                                        |     |
|--|--------------------------------------------------------------------------------------------------------------------------------------------------------------------------------------------------------------------------------------------------------------------------------------------------------|-----|
|  | $\begin{aligned} E[S(t)] = & \exp(\beta_0 + \beta_1 t + \beta_2 t^2 + \beta_3 \cos(t/365.25 \times 2\pi)) \\ & + \beta_4 \sin(t/365.25 \times 2\pi) + \sum_{i \in \mathcal{M}} \gamma_i m_i(t) \\ & + f(\text{meteo variables}) \\ & + g(\text{meteo variables}, m_i(t), \dots, m_M(t)) \end{aligned}$ | (2) |
|--|--------------------------------------------------------------------------------------------------------------------------------------------------------------------------------------------------------------------------------------------------------------------------------------------------------|-----|

The meteo variables used were temperature, relative humidity, wind speed and wind direction.

Where  $f$  is a linear function of meteo-variables with unknown parameters and  $g$  is a linear function of the product terms between meteo variables and missing indicators variables  $m_i(t)$ , each with an unknown parameter.

Furthermore, let

|  |                                                                                                                                                                                                   |     |
|--|---------------------------------------------------------------------------------------------------------------------------------------------------------------------------------------------------|-----|
|  | $\begin{aligned} I(t) = & \exp(\beta_0 + \beta_1 t + \beta_2 t^2 + \beta_3 \cos(t/365.25 \times 2\pi)) \\ & + \beta_4 \sin(t/365.25 \times 2\pi) + \hat{f}(\text{meteo variables}) \end{aligned}$ | (3) |
|--|---------------------------------------------------------------------------------------------------------------------------------------------------------------------------------------------------|-----|

We then further defined

|  |                                            |     |
|--|--------------------------------------------|-----|
|  | $S^{imp}(t) = S(t)/\hat{S}(t) \times I(t)$ | (4) |
|--|--------------------------------------------|-----|

Where  $\hat{S}(t)$  is the estimate of  $S(t)$  from the regression model. Finally, let

|  |                               |     |
|--|-------------------------------|-----|
|  | $C(t) = \frac{S^{imp}(t)}{M}$ | (5) |
|--|-------------------------------|-----|

If there are no missing values on a day  $t$  across all  $M$  stations, then all  $m_i(t)$  are 0, implying that  $I(t) = \hat{S}(t)$  and thus  $S^{imp}(t) = S(t)$ . In this case,  $C(t) = \frac{S(t)}{M}$  equal the mean of daily concentration values across all  $M$  stations. Therefore, on days with complete data, the algorithm makes no imputation.

## Time-series analysis results.

Table S1: Temporal spearman rank correlation coefficients among daily mean concentrations of ambient air pollutants and meteorological variables during the year and by seasons

|                  | PM <sub>10</sub>  | NO <sub>2</sub> | SO <sub>2</sub> | Temperature | Humidity |
|------------------|-------------------|-----------------|-----------------|-------------|----------|
|                  | Overall year      |                 |                 |             |          |
| PM <sub>10</sub> | 1                 |                 |                 |             |          |
| NO <sub>2</sub>  | 0.302             | 1               |                 |             |          |
| SO <sub>2</sub>  | 0.195             | 0.274           | 1               |             |          |
| Temperature      | 0.227             | -0.378          | 0.006           | 1           |          |
| Humidity         | -0.293            | 0.019           | -0.108          | -0.392      | 1        |
|                  | September – April |                 |                 |             |          |
| Warm season      |                   |                 |                 |             |          |
| PM <sub>10</sub> | 1                 |                 |                 |             |          |
| NO <sub>2</sub>  | 0.19              | 1               |                 |             |          |
| SO <sub>2</sub>  | 0.174             | 0.184           | 1               |             |          |
| Temperature      | 0.391             | -0.214          | 0.065           | 1           |          |
| Humidity         | -0.303            | -0.038          | -0.126          | -0.234      | 1        |
|                  | May – August      |                 |                 |             |          |
| Cold season      |                   |                 |                 |             |          |
| PM <sub>10</sub> | 1                 |                 |                 |             |          |
| NO <sub>2</sub>  | 0.572             | 1               |                 |             |          |
| SO <sub>2</sub>  | 0.321             | 0.402           | 1               |             |          |
| Temperature      | 0.026             | -0.087          | 0.067           | 1           |          |
| Humidity         | -0.271            | -0.337          | -0.231          | -0.006      | 1        |

Table S2: Single and multiple pollutant model adjusted relative risk (RR) for an interquartile range increase in the two-day moving average of PM10 concentrations and hospital admissions due to cardiovascular and respiratory diseases in all ages, age groups and sex, Cape Town, South Africa, 1 January 2011 - 31 October.

|                  | Pollutant IQR<br>(12ug/m3) | Respiratory disease |                         |                | Cardiovascular disease |                         |                |
|------------------|----------------------------|---------------------|-------------------------|----------------|------------------------|-------------------------|----------------|
|                  |                            | Relative risk       | 95% Confidence interval |                | Relative risk          | 95% Confidence interval |                |
|                  |                            |                     | Lower interval          | Upper interval |                        | Lower interval          | Upper interval |
| All ages and sex | PM10                       | 1.019               | 1.005                   | 1.032          | 1.021                  | 1.006                   | 1.035          |
| Age 0 - 14       |                            | 1.02                | 1.002                   | 1.039          |                        |                         |                |
| Age 15 - 64      |                            | 1.009               | 0.988                   | 1.03           | 1.021                  | 1.002                   | 1.039          |
| Age >65          |                            | 1.019               | 0.994                   | 1.046          | 1.022                  | 1.004                   | 1.041          |
| Female           |                            | 1.014               | 0.997                   | 1.032          | 1.02                   | 1.001                   | 1.04           |
| Male             |                            | 1.02                | 1.002                   | 1.037          | 1.021                  | 1.003                   | 1.038          |
|                  |                            |                     |                         |                |                        |                         |                |
| All ages and sex | PM10 <sub>NO2</sub>        | 1.009               | 0.992                   | 1.026          | 1.02                   | 1.003                   | 1.038          |
| Age 0 - 14       |                            | 1.008               | 0.984                   | 1.031          |                        |                         |                |
| Age 15 - 64      |                            | 1.005               | 0.978                   | 1.033          | 1.022                  | 1                       | 1.045          |
| Age >65          |                            | 1.02                | 0.986                   | 1.055          | 1.022                  | 0.999                   | 1.044          |
| Female           |                            | 1.006               | 0.985                   | 1.029          | 1.022                  | 0.997                   | 1.046          |
| Male             |                            | 1.012               | 0.989                   | 1.034          | 1.02                   | 0.999                   | 1.042          |
|                  |                            |                     |                         |                |                        |                         |                |
| All ages and sex | PM10 <sub>SO2</sub>        | 1.017               | 1.003                   | 1.031          | 1.022                  | 1.007                   | 1.037          |
| Age 0 - 14       |                            | 1.016               | 0.997                   | 1.035          |                        |                         |                |
| Age 15 - 64      |                            | 1.011               | 0.989                   | 1.033          | 1.021                  | 1.002                   | 1.041          |
| Age >65          |                            | 1.023               | 0.995                   | 1.051          | 1.026                  | 1.007                   | 1.045          |
| Female           |                            | 1.016               | 0.998                   | 1.034          | 1.02                   | 0.999                   | 1.041          |
| Male             |                            | 1.016               | 0.998                   | 1.035          | 1.026                  | 1.008                   | 1.044          |



|                  |                                                  |       |       |       |       |       |       |
|------------------|--------------------------------------------------|-------|-------|-------|-------|-------|-------|
| All ages and sex | NO <sub>2</sub> PM <sub>10</sub>                 | 1.016 | 0.995 | 1.038 | 0.997 | 0.976 | 1.019 |
| Age 0 - 14       |                                                  | 1.027 | 0.998 | 1.058 |       |       |       |
| Age 15 - 64      |                                                  | 1.012 | 0.979 | 1.047 | 0.992 | 0.965 | 1.02  |
| Age >65          |                                                  | 0.995 | 0.953 | 1.038 | 1.003 | 0.977 | 1.031 |
| Female           |                                                  | 1.018 | 0.99  | 1.047 | 0.994 | 0.965 | 1.024 |
| Male             |                                                  | 1.012 | 0.985 | 1.041 | 1.002 | 0.976 | 1.028 |
|                  |                                                  |       |       |       |       |       |       |
| All ages and sex | NO <sub>2</sub> SO <sub>2</sub>                  | 1.021 | 1.003 | 1.039 | 1.013 | 0.993 | 1.032 |
| Age 0 - 14       |                                                  | 1.032 | 1.007 | 1.058 |       |       |       |
| Age 15 - 64      |                                                  | 1.01  | 0.981 | 1.039 | 1.009 | 0.985 | 1.033 |
| Age >65          |                                                  | 1.015 | 0.979 | 1.053 | 1.02  | 0.997 | 1.045 |
| Female           |                                                  | 1.021 | 0.998 | 1.045 | 1.006 | 0.981 | 1.033 |
| Male             |                                                  | 1.018 | 0.995 | 1.042 | 1.019 | 0.997 | 1.043 |
|                  |                                                  |       |       |       |       |       |       |
| All ages and sex | NO <sub>2</sub> PM <sub>10</sub> SO <sub>2</sub> | 1.015 | 0.994 | 1.037 | 0.999 | 0.977 | 1.022 |
| Age 0 - 14       |                                                  | 1.029 | 0.999 | 1.061 |       |       |       |
| Age 15 - 64      |                                                  | 1.009 | 0.975 | 1.044 | 0.996 | 0.969 | 1.024 |
| Age >65          |                                                  | 0.999 | 0.956 | 1.043 | 1.005 | 0.978 | 1.033 |
| Female           |                                                  | 1.017 | 0.989 | 1.046 | 0.994 | 0.965 | 1.024 |
| Male             |                                                  | 1.011 | 0.983 | 1.04  | 1.005 | 0.979 | 1.032 |
|                  |                                                  |       |       |       |       |       |       |

Interquartile range: PM<sub>10</sub>: 12 ug/m<sup>3</sup>, NO<sub>2</sub> 7.3 µg/m<sup>3</sup>, SO<sub>2</sub> = 3.6 µg/m<sup>3</sup>. Relative risk estimated from Quasi-Poisson regression models, adjusting for time trends and seasonal variations, day of week, holiday meteorological factors including temperature and relative humidity. NO<sub>2</sub>PM<sub>10</sub>, NO<sub>2</sub>SO<sub>2</sub> and NO<sub>2</sub>PM<sub>10</sub> SO<sub>2</sub> refers to the estimate of NO<sub>2</sub> in multiple pollutant models. For cardiovascular disease age 0-14 was excluded from the modelling due to small sample size.

Table S4: Single and multiple pollutant model adjusted relative risk (RR) for an interquartile range increase in the two-day moving average of SO<sub>2</sub> concentrations and hospital admissions due to cardiovascular and respiratory diseases in all ages, age groups and sex, Cape Town, South Africa, 1 January 2011 - 31 October.

|                  | Pollutant IQR<br>(3.2ug/m <sup>3</sup> )        | Respiratory disease |                         |                | Cardiovascular disease |                         |                |
|------------------|-------------------------------------------------|---------------------|-------------------------|----------------|------------------------|-------------------------|----------------|
|                  |                                                 | Relative risk       | 95% Confidence interval |                | Relative risk          | 95% Confidence interval |                |
|                  |                                                 |                     | Lower interval          | Upper interval |                        | Lower interval          | Upper interval |
| All ages and sex | SO <sub>2</sub>                                 | 1.011               | 0.998                   | 1.024          | 0.997                  | 0.984                   | 1.011          |
| Age 0 - 14       |                                                 | 1.015               | 0.997                   | 1.033          |                        |                         |                |
| Age 15 - 64      |                                                 | 1.011               | 0.99                    | 1.032          | 0.998                  | 0.98                    | 1.015          |
| Age >65          |                                                 | 0.989               | 0.963                   | 1.015          | 0.995                  | 0.978                   | 1.012          |
| Female           |                                                 | 1.006               | 0.989                   | 1.023          | 1.009                  | 0.99                    | 1.028          |
| Male             |                                                 | 1.015               | 0.998                   | 1.032          | 0.987                  | 0.971                   | 1.003          |
| All ages and sex | SO <sub>2</sub> <sub>PM10</sub>                 | 1.006               | 0.993                   | 1.02           | 0.993                  | 0.979                   | 1.007          |
| Age 0 - 14       |                                                 | 1.011               | 0.991                   | 1.03           |                        |                         |                |
| Age 15 - 64      |                                                 | 1.011               | 0.989                   | 1.033          | 0.992                  | 0.974                   | 1.011          |
| Age >65          |                                                 | 0.986               | 0.959                   | 1.014          | 0.989                  | 0.972                   | 1.007          |
| Female           |                                                 | 1.005               | 0.987                   | 1.023          | 1.004                  | 0.985                   | 1.024          |
| Male             |                                                 | 1.008               | 0.99                    | 1.027          | 0.981                  | 0.965                   | 0.998          |
| All ages and sex | SO <sub>2</sub> <sub>NO2</sub>                  | 1.005               | 0.991                   | 1.019          | 0.999                  | 0.984                   | 1.014          |
| Age 0 - 14       |                                                 | 1.005               | 0.985                   | 1.025          |                        |                         |                |
| Age 15 - 64      |                                                 | 1.016               | 0.992                   | 1.039          | 1.001                  | 0.982                   | 1.02           |
| Age >65          |                                                 | 0.981               | 0.953                   | 1.011          | 0.992                  | 0.974                   | 1.011          |
| Female           |                                                 | 1.003               | 0.984                   | 1.022          | 1.008                  | 0.987                   | 1.028          |
| Male             |                                                 | 1.007               | 0.988                   | 1.026          | 0.987                  | 0.969                   | 1.004          |
| All ages and sex | SO <sub>2</sub> <sub>PM10</sub> NO <sub>2</sub> | 1.003               | 0.989                   | 1.018          | 0.996                  | 0.981                   | 1.011          |

|             |  |       |       |       |       |       |       |
|-------------|--|-------|-------|-------|-------|-------|-------|
| Age 0 - 14  |  | 1.004 | 0.984 | 1.025 |       |       |       |
| Age 15 - 64 |  | 1.015 | 0.991 | 1.039 | 0.998 | 0.979 | 1.017 |
| Age >65     |  | 0.978 | 0.949 | 1.008 | 0.989 | 0.97  | 1.008 |
| Female      |  | 1.001 | 0.982 | 1.021 | 1.004 | 0.984 | 1.025 |
| Male        |  | 1.006 | 0.986 | 1.025 | 0.983 | 0.965 | 1.001 |
|             |  |       |       |       |       |       |       |

Interquartile range: PM10: 12 ug/m<sup>3</sup>, NO<sub>2</sub> 7.3 µg/m<sup>3</sup>, SO<sub>2</sub> = 3.6 µg/m<sup>3</sup>. Relative risk estimated from Quasi-Poisson regression models, adjusting for time trends and seasonal variations, day of week, holiday meteorological factors including temperature and relative humidity. SO<sub>2</sub>PM<sub>10</sub>, SO<sub>2</sub>NO<sub>2</sub> and SO<sub>2</sub>PM<sub>10</sub> NO<sub>2</sub> refers to the estimate of SO<sub>2</sub> in multiple pollutant models. For cardiovascular disease age 0-14 was excluded from the modelling due to small sample size. For cardiovascular disease age 0-14 was excluded from the modelling due to small sample size.

Table S5: Warm season – Single and multiple pollutant model adjusted relative risk (RR) for an interquartile range increase in the two-day moving average of PM10 concentrations and hospital admissions due to cardiovascular and respiratory diseases in all ages, Cape Town, South Africa, 1 January 2011 - 31 October.

|                  | Pollutant IQR (ug/m <sup>3</sup> ) | Respiratory disease |                         |                | Cardiovascular disease |                         |                |
|------------------|------------------------------------|---------------------|-------------------------|----------------|------------------------|-------------------------|----------------|
|                  |                                    | Relative risk       | 95% Confidence interval |                | Relative risk          | 95% Confidence interval |                |
|                  |                                    |                     | Lower interval          | Upper interval |                        | Lower interval          | Upper interval |
| All ages and sex | PM10                               | 1.022               | 1.005                   | 1.039          | 1.034                  | 1.015                   | 1.053          |
|                  | NO <sub>2</sub>                    | 1.013               | 0.994                   | 1.033          | 1.006                  | 0.988                   | 1.025          |
|                  | SO <sub>2</sub>                    | 1.023               | 0.996                   | 1.049          | 1.027                  | 1.002                   | 1.054          |
|                  |                                    |                     |                         |                |                        |                         |                |

Interquartile range: PM10: 9.7 ug/m<sup>3</sup>, NO<sub>2</sub> 5.4 µg/m<sup>3</sup>, SO<sub>2</sub> = 3.0 µg/m<sup>3</sup>. Relative risk estimated from Quasi-Poisson regression models, adjusting for time trends and seasonal variations, day of week, holiday meteorological factors including temperature and relative humidity. PM10NO<sub>2</sub>, PM10SO<sub>2</sub> and PM10NO<sub>2</sub> SO<sub>2</sub> refers to the estimate of PM10 in multiple pollutant models. For cardiovascular disease age 0-14 was excluded from the modelling due to small sample size. The warm season were the months of September – April.





Table S7: Single and multiple pollutant model adjusted relative risk (RR) for 10 ug/m<sup>3</sup> increase in the two-day moving average of PM<sub>10</sub> concentrations and hospital admissions due to cardiovascular and respiratory diseases in all ages, age groups and sex, Cape Town, South Africa, 1 January 2011 - 31 October.

|                  | Pollutant<br>(10ug/m <sup>3</sup> )           | Respiratory disease |                         |                | Cardiovascular disease |                         |                |
|------------------|-----------------------------------------------|---------------------|-------------------------|----------------|------------------------|-------------------------|----------------|
|                  |                                               | Relative risk       | 95% Confidence interval |                | Relative risk          | 95% Confidence interval |                |
|                  |                                               |                     | Lower interval          | Upper interval |                        | Lower interval          | Upper interval |
| All ages and sex | PM <sub>10</sub>                              | 1.018               | 1.005                   | 1.03           | 1.019                  | 1.006                   | 1.033          |
| Age 0 - 14       |                                               | 1.02                | 1.002                   | 1.037          |                        |                         |                |
| Age 15 - 64      |                                               | 1.009               | 0.989                   | 1.029          | 1.019                  | 1.001                   | 1.037          |
| Age >65          |                                               | 1.018               | 0.994                   | 1.044          | 1.021                  | 1.004                   | 1.039          |
| Female           |                                               | 1.014               | 0.997                   | 1.031          | 1.019                  | 1.001                   | 1.039          |
| Male             |                                               | 1.019               | 1.002                   | 1.035          | 1.02                   | 1.003                   | 1.036          |
| All ages and sex | PM <sub>10NO<sub>2</sub></sub>                | 1.009               | 0.993                   | 1.025          | 1.019                  | 1.002                   | 1.036          |
| Age 0 - 14       |                                               | 1.007               | 0.985                   | 1.03           |                        |                         |                |
| Age 15 - 64      |                                               | 1.005               | 0.979                   | 1.031          | 1.021                  | 1                       | 1.043          |
| Age >65          |                                               | 1.019               | 0.986                   | 1.052          | 1.021                  | 0.999                   | 1.042          |
| Female           |                                               | 1.006               | 0.985                   | 1.027          | 1.021                  | 0.998                   | 1.044          |
| Male             |                                               | 1.011               | 0.99                    | 1.033          | 1.019                  | 0.999                   | 1.04           |
| All ages and sex | PM <sub>10SO<sub>2</sub></sub>                | 1.016               | 1.003                   | 1.029          | 1.023                  | 1.009                   | 1.038          |
| Age 0 - 14       |                                               | 1.018               | 0.999                   | 1.036          |                        |                         |                |
| Age 15 - 64      |                                               | 1.01                | 0.989                   | 1.032          | 1.02                   | 1.002                   | 1.039          |
| Age >65          |                                               | 1.022               | 0.995                   | 1.049          | 1.025                  | 1.007                   | 1.043          |
| Female           |                                               | 1.015               | 0.998                   | 1.033          | 1.019                  | 0.999                   | 1.039          |
| Male             |                                               | 1.016               | 0.998                   | 1.033          | 1.025                  | 1.008                   | 1.042          |
| All ages and sex | PM <sub>10NO<sub>2</sub> SO<sub>2</sub></sub> | 1.008               | 0.992                   | 1.025          | 1.022                  | 1.005                   | 1.039          |

|             |  |       |       |       |       |       |       |
|-------------|--|-------|-------|-------|-------|-------|-------|
| Age 0 - 14  |  | 1.006 | 0.983 | 1.029 |       |       |       |
| Age 15 - 64 |  | 1.003 | 0.976 | 1.029 | 1.021 | 0.999 | 1.043 |
| Age >65     |  | 1.023 | 0.99  | 1.057 | 1.024 | 1.002 | 1.046 |
| Female      |  | 1.006 | 0.985 | 1.028 | 1.019 | 0.996 | 1.044 |
| Male        |  | 1.01  | 0.988 | 1.032 | 1.023 | 1.002 | 1.044 |
|             |  |       |       |       |       |       |       |

Average: PM10: 24.4 ug/m3, NO2 15 µg/m3, SO2 = 9.4 µg/m3. Relative risk estimated from Quasi-Poisson regression models, adjusting for time trends and seasonal variations, day of week, holiday meteorological factors including temperature and relative humidity. PM10<sub>NO2</sub>, PM10<sub>SO2</sub> and PM10<sub>NO2 SO2</sub> refers to the estimate of PM10 in multiple pollutant models. For cardiovascular disease age 0-14 was excluded from the modelling due to small sample size.

Table S8: Single and multiple pollutant model adjusted relative risk (RR) for 10 ug/m3 increase in the two-day moving average of NO2 concentrations and hospital admissions due to cardiovascular and respiratory diseases in all ages, age groups and sex, Cape Town, South Africa, 1 January 2011 - 31 October.

|                  | Pollutant IQR<br>(6.8ug/m3) | Respiratory disease |                         |                | Cardiovascular disease |                         |                |
|------------------|-----------------------------|---------------------|-------------------------|----------------|------------------------|-------------------------|----------------|
|                  |                             | Relative risk       | 95% Confidence interval |                | Relative risk          | 95% Confidence interval |                |
|                  |                             |                     | Lower interval          | Upper interval |                        | Lower interval          | Upper interval |
| All ages and sex | NO2                         | 1.034               | 1.008                   | 1.059          | 1.013                  | 0.987                   | 1.04           |
| Age 0 - 14       |                             | 1.048               | 1.013                   | 1.084          |                        |                         |                |
| Age 15 - 64      |                             | 1.004               | 0.965                   | 1.044          | 1.009                  | 0.975                   | 1.044          |
| Age >65          |                             | 1.008               | 0.959                   | 1.058          | 1.025                  | 0.991                   | 1.06           |
| Female           |                             | 1.021               | 0.989                   | 1.055          | 1.011                  | 0.975                   | 1.049          |
| Male             |                             | 1.029               | 0.996                   | 1.062          | 1.022                  | 0.989                   | 1.055          |
| All ages and sex | NO2 <sub>PM10</sub>         | 1.024               | 0.993                   | 1.056          | 0.996                  | 0.964                   | 1.028          |
| Age 0 - 14       |                             | 1.04                | 0.997                   | 1.086          |                        |                         |                |
| Age 15 - 64      |                             | 1.018               | 0.969                   | 1.07           | 0.988                  | 0.949                   | 1.029          |

|                  |                                                  |       |       |       |       |       |       |
|------------------|--------------------------------------------------|-------|-------|-------|-------|-------|-------|
| Age >65          |                                                  | 0.992 | 0.931 | 1.057 | 1.005 | 0.966 | 1.046 |
| Female           |                                                  | 1.027 | 0.986 | 1.069 | 0.991 | 0.949 | 1.035 |
| Male             |                                                  | 1.018 | 0.978 | 1.061 | 1.003 | 0.965 | 1.041 |
|                  |                                                  |       |       |       |       |       |       |
| All ages and sex | NO <sub>2</sub> SO <sub>2</sub>                  | 1.031 | 1.004 | 1.058 | 1.022 | 0.994 | 1.051 |
| Age 0 - 14       |                                                  | 1.045 | 1.008 | 1.084 |       |       |       |
| Age 15 - 64      |                                                  | 1.015 | 0.973 | 1.058 | 1.01  | 0.976 | 1.047 |
| Age >65          |                                                  | 1.023 | 0.97  | 1.079 | 1.03  | 0.995 | 1.066 |
| Female           |                                                  | 1.032 | 0.997 | 1.067 | 1.009 | 0.972 | 1.048 |
| Male             |                                                  | 1.027 | 0.992 | 1.063 | 1.029 | 0.995 | 1.063 |
|                  |                                                  |       |       |       |       |       |       |
| All ages and sex | NO <sub>2</sub> PM <sub>10</sub> SO <sub>2</sub> | 1.022 | 0.991 | 1.054 | 1.001 | 0.969 | 1.034 |
| Age 0 - 14       |                                                  | 1.039 | 0.995 | 1.085 |       |       |       |
| Age 15 - 64      |                                                  | 1.013 | 0.963 | 1.065 | 0.992 | 0.952 | 1.033 |
| Age >65          |                                                  | 0.998 | 0.936 | 1.064 | 1.007 | 0.968 | 1.049 |
| Female           |                                                  | 1.026 | 0.984 | 1.069 | 0.991 | 0.949 | 1.036 |
| Male             |                                                  | 1.016 | 0.975 | 1.059 | 1.008 | 0.97  | 1.047 |
|                  |                                                  |       |       |       |       |       |       |

Average: PM<sub>10</sub>: 24.4 ug/m<sup>3</sup>, NO<sub>2</sub> 15 µg/m<sup>3</sup>, SO<sub>2</sub> = 9.4 µg/m<sup>3</sup>. Relative risk estimated from Quasi-Poisson regression models, adjusting for time trends and seasonal variations, day of week, holiday meteorological factors including temperature and relative humidity. NO<sub>2</sub>PM<sub>10</sub>, NO<sub>2</sub>SO<sub>2</sub> and NO<sub>2</sub>PM<sub>10</sub> SO<sub>2</sub> refers to the estimate of NO<sub>2</sub> in multiple pollutant models. For cardiovascular disease age 0-14 was excluded from the modelling due to small sample size.

Table S9: Single and multiple pollutant model adjusted relative risk (RR) for 10 ug/m<sup>3</sup> increase in the two-day moving average of SO<sub>2</sub> concentrations and hospital admissions due to cardiovascular and respiratory diseases in all ages, age groups and sex, Cape Town, South Africa, 1 January 2011 - 31 October.

|                  | Pollutant IQR<br>(3.2ug/m <sup>3</sup> )         | Respiratory disease |                         |                | Cardiovascular disease |                         |                |
|------------------|--------------------------------------------------|---------------------|-------------------------|----------------|------------------------|-------------------------|----------------|
|                  |                                                  | Relative risk       | 95% Confidence interval |                | Relative risk          | 95% Confidence interval |                |
|                  |                                                  |                     | Lower interval          | Upper interval |                        | Lower interval          | Upper interval |
| All ages and sex | SO <sub>2</sub>                                  | 1.035               | 0.993                   | 1.078          | 0.988                  | 0.947                   | 1.031          |
| Age 0 - 14       |                                                  | 1.044               | 0.988                   | 1.104          |                        |                         |                |
| Age 15 - 64      |                                                  | 1.035               | 0.97                    | 1.103          | 0.993                  | 0.94                    | 1.049          |
| Age >65          |                                                  | 0.966               | 0.891                   | 1.048          | 0.984                  | 0.932                   | 1.039          |
| Female           |                                                  | 1.012               | 0.96                    | 1.067          | 1.028                  | 0.97                    | 1.091          |
| Male             |                                                  | 1.035               | 0.978                   | 1.094          | 0.96                   | 0.912                   | 1.011          |
| All ages and sex | SO <sub>2</sub> PM <sub>10</sub>                 | 1.02                | 0.977                   | 1.064          | 0.973                  | 0.931                   | 1.017          |
| Age 0 - 14       |                                                  | 1.03                | 0.971                   | 1.093          |                        |                         |                |
| Age 15 - 64      |                                                  | 1.034               | 0.965                   | 1.107          | 0.976                  | 0.923                   | 1.033          |
| Age >65          |                                                  | 0.958               | 0.878                   | 1.046          | 0.967                  | 0.914                   | 1.023          |
| Female           |                                                  | 1.015               | 0.96                    | 1.073          | 1.014                  | 0.954                   | 1.077          |
| Male             |                                                  | 1.025               | 0.969                   | 1.085          | 0.943                  | 0.894                   | 0.994          |
| All ages and sex | SO <sub>2</sub> NO <sub>2</sub>                  | 1.015               | 0.971                   | 1.062          | 0.985                  | 0.94                    | 1.032          |
| Age 0 - 14       |                                                  | 1.016               | 0.954                   | 1.081          |                        |                         |                |
| Age 15 - 64      |                                                  | 1.05                | 0.977                   | 1.128          | 0.997                  | 0.941                   | 1.058          |
| Age >65          |                                                  | 0.943               | 0.86                    | 1.034          | 0.976                  | 0.92                    | 1.035          |
| Female           |                                                  | 1.01                | 0.952                   | 1.071          | 1.024                  | 0.961                   | 1.091          |
| Male             |                                                  | 1.021               | 0.962                   | 1.084          | 0.959                  | 0.907                   | 1.014          |
| All ages and sex | SO <sub>2</sub> PM <sub>10</sub> NO <sub>2</sub> | 1.01                | 0.965                   | 1.057          | 0.975                  | 0.931                   | 1.022          |

|             |  |       |       |       |       |       |       |
|-------------|--|-------|-------|-------|-------|-------|-------|
| Age 0 - 14  |  | 1.012 | 0.95  | 1.078 |       |       |       |
| Age 15 - 64 |  | 1.046 | 0.973 | 1.126 | 0.986 | 0.929 | 1.046 |
| Age >65     |  | 0.934 | 0.85  | 1.025 | 0.966 | 0.91  | 1.025 |
| Female      |  | 1.004 | 0.946 | 1.065 | 1.014 | 0.951 | 1.081 |
| Male        |  | 1.018 | 0.958 | 1.081 | 0.949 | 0.896 | 1.004 |
|             |  |       |       |       |       |       |       |

Average: PM10: 24.4 ug/m3, NO2 15 µg/m3, SO2 = 9.4 µg/m3. Relative risk estimated from Quasi-Poisson regression models, adjusting for time trends and seasonal variations, day of week, holiday meteorological factors including temperature and relative humidity. SO2<sub>PM10</sub>, SO2<sub>NO2</sub> and SO2<sub>PM10 NO2</sub> refers to the estimate of SO2 in multiple pollutant models. For cardiovascular disease age 0-14 was excluded from the modelling due to small sample size. For cardiovascular disease age 0-14 was excluded from the modelling due to small sample size.
